# Supplementary material
Source: publisher site journal article supplement (https://www.degruyter.com/publication/journal_key/PHYS/downloadAsset/PHYS_CFP%20Fundamental%20Physics%20from%20Atoms%20to%20Cosmos.pdf)
Supplement: Supplementary file 1 [file PHYS_CFP%20Fundamental%20Physics%20from%20Atoms%20to%20Cosmos.pdf]

# FUNDAMENTAL PHYSICS: FROM ATOMS TO COSMOS

## GUEST EDITORS

---

**Lead Guest Editor: Prof. Dr. Eugene Oks**, Physics Department, Auburn University, Auburn, USA  
E-mail: [oksevgu@auburn.edu](mailto:oksevgu@auburn.edu)

**Prof. Dr. Elisabeth Dalimier**, LULI - Sorbonne Université, CNRS, Ecole Polytechnique, CEA, Université Paris, France  
E-mail: [elisabeth.dalimier@upmc.fr](mailto:elisabeth.dalimier@upmc.fr)

## DESCRIPTION

---

For this Special Issue we invite theoretical and experimental studies related to all areas of fundamental physics: from nuclear physics to atomic/molecular physics, and to astrophysical objects. We welcome reviews and regular research papers without imposing any restrictions on the length of the paper. We also welcome short communications. They are expected to contain a preliminary presentation of interesting, potentially important ideas.

Potential topics include but are not limited to the following issues:

- ▶ Classical mechanics
- ▶ Quantum mechanics
- ▶ Atomic, molecular, and optical physics
- ▶ Physics of plasmas and gases (including Plasma Spectroscopy)
- ▶ Astronomy and Astrophysics (including Cosmology)
- ▶ Condensed matter physics
- ▶ Nuclear physics
- ▶ Physics of elementary particles and fields
- ▶ Interdisciplinary physics

## PUBLICATION SCHEDULE / HOW TO SUBMIT

---

**Open for submissions: 1st October 2023**  
**Paper submission deadline: 31st October, 2024**

Before submitting, authors should carefully read the Instruction for Authors, which is available at: [https://www.degruyter.com/publication/journal\\_key/PHYS/downloadAsset/PHYS\\_Instruction%20for%20Authors.pdf](https://www.degruyter.com/publication/journal_key/PHYS/downloadAsset/PHYS_Instruction%20for%20Authors.pdf)

Manuscripts should be submitted to the journal via the online Editorial Manager submission system available at: <https://www.editorialmanager.com/openphys/default.aspx>

All submissions will undergo the standard single-blind peer review system. When entering your submission please choose the option type of an article: "Fundamental Physics: from Atoms to Cosmos". In case of any technical problems, please contact the Managing Editor of *Open Physics*:  
**Juliusz Skoryna, Ph.D., [Juliusz.Skoryna@degruyter.com](mailto:Juliusz.Skoryna@degruyter.com)**
